# Supplementary material for: Targeted Cell-to-Cell Delivery of Protein Payloads via the Granzyme-Perforin Pathway
Source: PubMed Central journal article supplement — Mol Ther Methods Clin Dev. 2017 Oct 10;7:132–45. doi: 10.1016/j.omtm.2017.10.003 (PMC5700818; doi:10.1016/j.omtm.2017.10.003), 2017-10-10
Supplement: mmc1.pdf [file mmc1.pdf]

**OMTM, Volume 7**

**Supplemental Information**

**Targeted Cell-to-Cell Delivery of Protein**

**Payloads via the Granzyme-Perforin Pathway**

**Daniel J. Woodsworth, Lisa Dreolini, Libin Abraham, and Robert A. Holt**

# 1 Plasmids

## 1.1 Base pdL plasmid

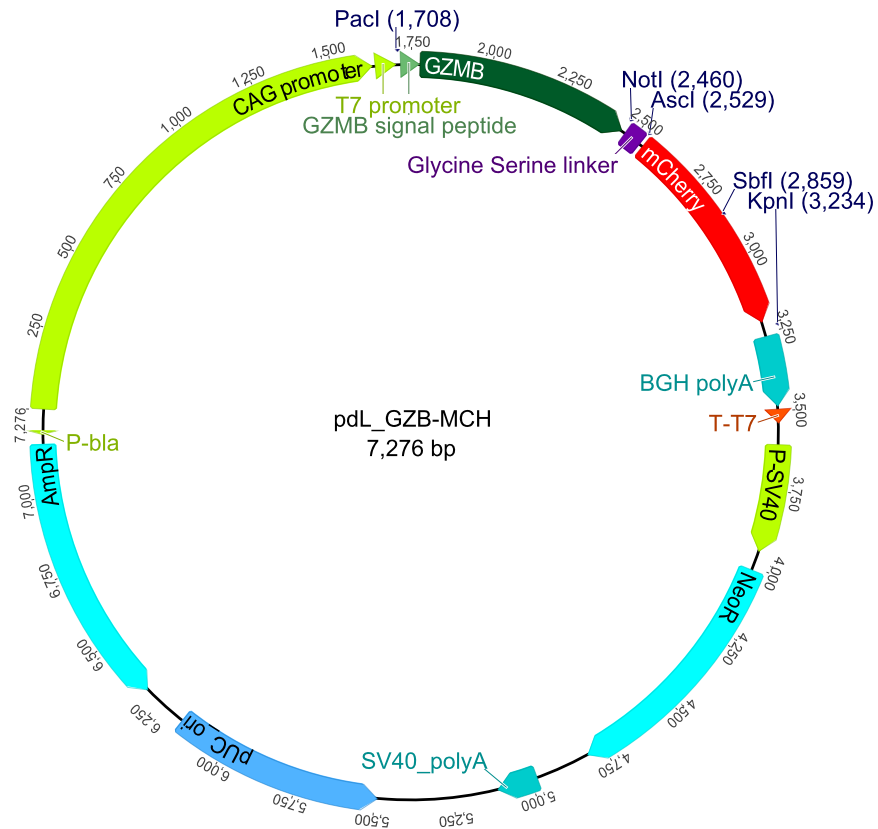

Supplementary Figure 1: Base pdL vector. In this example the insert coding sequence is the granzyme B-crmCherry fusion protein (GZB-MCH). The annotations correspond to those in the genbank file.

## 1.2 Base pDL plasmid sequence

LOCUS pdL\_GZB-MCH 7276 bp DNA circular UNA 21-FEB-2017  
 DEFINITION .  
 ACCESSION .  
 VERSION .  
 KEYWORDS .  
 SOURCE .  
 ORGANISM .

FEATURES Location/Qualifiers  
 promoter 2..1628  
 /label="CAG promoter"  
 promoter 1635..1702  
 /label="T7 promoter"  
 sig\_peptide 1717..1776  
 /gene="GZMB"  
 /label="GZMB signal peptide"  
 mat\_peptide 1777..2457  
 /gene="GZMB"  
 /product="granzyme B"  
 /label="GZMB"  
 misc\_feature 2467..2526  
 /note="Geneious type: polylinker"  
 /label="Glycine Serine linker"  
 CDS 2536..3216  
 /label="mCherry"  
 polyA\_signal 3262..3486  
 /label="BGH polyA"  
 terminator 3495..3538  
 /label="T-T7"  
 promoter 3606..3949  
 /label="P-SV40"  
 misc\_feature 4011..4805  
 /note="Geneious type: Marker"  
 /label="NeoR"  
 polyA\_signal 4979..5109  
 /label="SV40\_polyA"  
 misc\_feature complement(5492..6162)  
 /note="Geneious type: Origin of Replication"  
 /label="pUC\_ori"  
 misc\_feature complement(6307..7167)  
 /note="Geneious type: Marker"  
 /label="AmpR"  
 promoter complement(7202..7208)  
 /label="P-bla"

ORIGIN  
 1 ctgcaggcgt tacataaactt acggtaaagt gcccgctgg ctgaccgccc aacgaccccc  
 61 gccattgac gtcaataatg acgtatgttc ccatagtaac gccaataggg actttccatt  
 121 gacgtcaatg ggtggagtat ttacggtaaa ctgccactt ggccagtacat caagtgtatc  
 181 atatgccaag tacgccccct attgacgtca atgacggtaa atggccccgc tggcattatg  
 241 ccagtagat gaccttatgg gactttccta ctggcagta catctacgta ttagtcatcg  
 301 ctattaacat ggtcgagggtg agccccacgt tctgcttac tctccccatc tccccccct  
 361 cccaccccc aattttgtat ttattttatt tttaattatt ttgtgcagcg atggggggcgg  
 421 gggggggggg ggggcgcgcg ccaggcgggg cggggcgggg cgagggcggg ggcggggcga  
 481 ggcgagagg tgccggcgca gccaatcaga gcggcgcgct ccgaaagttt ccttttatgg  
 541 cgaggcggcg gcggcggcgg ccctataaaa agcgaagcgc gcggcggcgg gggagtcgct

|      |             |            |             |             |             |             |
|------|-------------|------------|-------------|-------------|-------------|-------------|
| 601  | gcgacgctgc  | cttcgccccg | tgccccgctc  | cgccgcccgc  | tcgcccgcgc  | cgccccggct  |
| 661  | ctgactgacc  | gcgttactcc | cacaggtgag  | cgggcgggac  | ggcccttctc  | ctccgggctg  |
| 721  | taattagcgc  | ttggtttaat | gacggcttgt  | ttcttttctg  | tggctgctgt  | aaagccttga  |
| 781  | ggggctccgg  | gagggccctt | tgtgccccgg  | gagcggctcg  | gggggtgctg  | gctgtgtgtg  |
| 841  | gtgctggtgg  | agcgcgcgt  | gcggctccgc  | gctgccccgc  | ggctgtgagc  | gctgccccgc  |
| 901  | cggcgcgggg  | ctttgtgcgc | tccgcagtgt  | gcgcgagggg  | agcgcggccg  | ggggcggtgc  |
| 961  | cccgcgggtc  | ggggggggct | gcgaggggaa  | caaaaggctg  | gtgcgggggtg | tgtgctgtgg  |
| 1021 | gggggtgagca | gggggtgtgg | gcgcgtcggg  | cgggctgcaa  | ccccccctgc  | acccccctcc  |
| 1081 | ccgagttgct  | gagcacggcc | cggttcgggg  | tgccggggctc | cgtacggggc  | gtggcgcggg  |
| 1141 | gctgcgccgt  | ccgggcgggg | ggtggcggca  | ggtgggggtg  | ccgggcgggg  | cggggcgcc   |
| 1201 | tcgggcccgg  | gagggctcgg | gggagggcg   | cgccggcccc  | cgagcgcgg   | cgcgctgtcg  |
| 1261 | aggcgcggcg  | agccgcagcc | attgcctttt  | atggtaatcg  | tgcgagaggg  | cgcagggact  |
| 1321 | tcctttgttc  | caaatctgtg | cgagccgaa   | atctgggagg  | cgcccgccga  | cccccttag   |
| 1381 | cgggcgcggg  | gcgaagcggg | gcggcgcggg  | caggaaggaa  | atggcggggg  | agggccttcg  |
| 1441 | tgcgctgcgc  | cgccgcgcgt | cccttctccc  | tctccagcct  | cggggctgtc  | cgccggggga  |
| 1501 | cggtgcctt   | cgggggggac | ggggcagggc  | ggggttcggc  | ttctgctgtg  | tgaccgcggg  |
| 1561 | ctctagacaa  | ttgtactaac | cttcttctct  | ttctctctct  | gacaggttga  | tgtacagtag  |
| 1621 | cttccaccac  | cggttaatac | gactcactat  | aggctagcat  | ttaggtgaca  | ctatagaata  |
| 1681 | caagctactt  | gttctttttg | cattaattaa  | gccccatgc   | aaccaatcct  | gcttctgtctg |
| 1741 | gccttcctcc  | tgctgcccag | ggcagatgca  | ggggagatca  | tcgggggaca  | tgaggccaag  |
| 1801 | ccccactccc  | gccccatac  | ggcttatctt  | atgatctggg  | atcagaagtc  | tctgaagagg  |
| 1861 | tgccgtggct  | tcctgatacg | agacgacttc  | gtgctgacag  | ctgctcactg  | ttggggaagc  |
| 1921 | tcataaatg   | tcaccttggg | ggccccaaat  | atcaaaagac  | aggagccgac  | ccagcagttt  |
| 1981 | atccctgtga  | aaagaccat  | ccccatcca   | gcctataatc  | ctaagaactt  | ctccaacgac  |
| 2041 | atcatgctac  | tgcaagctga | gagaaaggcc  | aagcggacca  | gagctgtgca  | gcccccagg   |
| 2101 | ctacctagca  | acaaggccca | ggtgaagcca  | gggcagacat  | gcagtgtggc  | cggtgtgggg  |
| 2161 | cagacggccc  | ccctgggaaa | acactcacac  | acactacaag  | aggtgaagat  | gacagtgcag  |
| 2221 | gaagatcgaa  | agtgcgaatc | tgacttacgc  | cattattacg  | acagtacat   | tgagttgtgc  |
| 2281 | gtgggggacc  | cagagattaa | aaagacttcc  | tttaaggggg  | actctggagg  | ccctctgtgtg |
| 2341 | tgtaaacaag  | tggcccaggg | cattgtctcc  | tatggacgaa  | acaatggcat  | gcctccacga  |
| 2401 | gcctgcacca  | aagtctcaag | ctttgtacac  | tgataaaaga  | aaaccatgaa  | acgctacgcg  |
| 2461 | gcccctggag  | gtgggggttc | tgccgggggt  | ggatcagggg  | gtggagggtt  | cggtggagggt |
| 2521 | gggtcggggc  | cgcccatcat | caaggagttc  | atgcgcttca  | aggtgcacat  | ggagggctcc  |
| 2581 | gtgaacggcc  | acgagttcga | gatcaggggc  | gagggcgagg  | gcccgcccta  | cgagggcacc  |
| 2641 | cagaccgcca  | agctgaaggt | gaccaagggt  | ggccccctgc  | ccttcgcctg  | ggacatctctg |
| 2701 | tcccctcagt  | tcattgtacg | ctccaaggcc  | tacgtgaagc  | accccgcga   | catccccgac  |
| 2761 | tacttgaagc  | tgctcttccc | cgagggcttc  | aagtgggagc  | gcgtgatgaa  | cttcgaggac  |
| 2821 | ggcggcgtgg  | tgaccgtgac | ccaggactcc  | tccctgcagg  | acggcgagtt  | catctacaag  |
| 2881 | gtgaagctgc  | gcggcaccaa | cttcccctcc  | gacggccccg  | taatgcagaa  | gaagaccatg  |
| 2941 | ggctgggagg  | cctcctccga | gcggatgtac  | cccaggagac  | gcgcctgaa   | gggcgagatc  |
| 3001 | aagcagaggc  | tgaagctgaa | ggacggcggc  | cactacgacg  | ctgaggtcaa  | gaccacctac  |
| 3061 | aaggccaaga  | agcccgtgca | gctgcccggc  | gcctacaacg  | tcaacatcaa  | gttgacatc   |
| 3121 | acctcccaca  | acgaggacta | caccatcgtg  | gaacagtagc  | aacgcgccga  | gggcccacc   |
| 3181 | tcaccggcg   | gcatggacga | gctgtacaag  | gaattcta    | agctcgaggg  | taccactagt  |
| 3241 | tagcccgtg   | atcagcctcg | actgtgcctt  | ctagttgcca  | gccatctgtt  | gtttgcccc   |
| 3301 | ccccctgccc  | ttccttgacc | ctggaagggtg | ccactcccac  | tgtcctttcc  | taataaaatg  |
| 3361 | aggaaattgc  | atcgcatgtg | ctgagtaggt  | gtcattctat  | tctggggggt  | gggggtggggc |
| 3421 | aggacagcaa  | gggggaggat | tgggaagaca  | atagcaggca  | tgctggggat  | gcgggtgggct |
| 3481 | ctatggtaac  | gcgtataacc | ccttggggcc  | tctaaacggg  | tcttgagggg  | tttttggact  |
| 3541 | cgagcgaatt  | cggcctattg | gttaaaaaat  | gagctgattt  | aacaaaaat   | taacgcgaat  |
| 3601 | taattctgtg  | gaatgtgtg  | cagttagggt  | gtggaagtc   | cccaggctcc  | ccagcaggca  |
| 3661 | gaagtatgca  | aagcatgcat | ctcaattagt  | cagcaaccag  | gtgtggaaag  | tccccaggct  |
| 3721 | cccagcagg   | cagaagtatg | caaagcatgc  | atctcaatta  | gtcagcaacc  | atagctccgc  |
| 3781 | ccctaactcc  | gccccatccc | cccctaactc  | cgccagttc   | cgccattct   | ccgccccatg  |
| 3841 | gctgactaat  | tttttttatt | tatgcagagg  | ccgagggccg  | ctctgcctct  | gagctattcc  |
| 3901 | agaagtagtg  | aggaggcttt | tttggaggcc  | taggcttttg  | caaaaagctc  | ccgggagctt  |
| 3961 | gtatatccat  | tttcggatct | gatcaagaga  | caggatgagg  | atcgtttcgc  | atgattgaac  |

4021 aagatggatt gcacgcaggt tctccggccg cttgggtgga gaggctattc ggctatgact  
4081 gggcacaaca gacaatcggc tgctctgatg ccgccgtgtt cgggctgtca gcgcaggggc  
4141 gcccggttct ttttgtcaag accgacctgt ccgggtgccct gaatgaactg caggacgagg  
4201 cagcgcggct atcgtggctg gccacgacgg gcgttccttg cgcagctgtg ctcgacgttg  
4261 tactgaagc gggaaggac tggctgctat tgggcgaagt gccggggcag gatctcctgt  
4321 catctcacct tgctcctgcc gagaaagtat ccatcatggc tgatgcaatg cggcggctgc  
4381 atacgcttga tccggctacc tgccccctcg accaccaagc gaaacatcgc atcgagcgag  
4441 cagctactcg gatggaagcc ggtccttgcg atcaggatga tctggacgaa gagcatcagg  
4501 ggctcgcgcc agccgaactg ttcgccaggc tcaaggcgcg catgcccgcg ggcgaggatc  
4561 tcgtcgtgac ccatggcgat gcctgctgac cgaatatcat ggtggaaaat ggccgctttt  
4621 ctggattcat cgactgtggc cggctgggtg tggcggaccg ctatcaggac atagcgttgg  
4681 ctaccctgta tattgctgaa gagcttggcg gcgaatgggc tgaccgcttc ctcgtgcttt  
4741 acggtatcgc cgctcccgat tcgcagcgcgca tcgccttcta tcgccttctt gacgagttct  
4801 tctgagcggg actctggggt tcgaaatgac cgaccaagcg acgcccacc tgccatcacg  
4861 agatctcgat tccaccgccg ccttctatga aaggttgggc ttcggaatcg ttttccggga  
4921 cgccggctgg atgatcctcc agcgcgggga tctcatgctg gagttcttcg cccaccctaa  
4981 cttgtttatt gcagcttata atggttaaca ataaagcaat agcatcaca atttcaciaa  
5041 taaagcattt ttttcaactg attctagtgg tggtttgtcc aaactcatca atgtatctta  
5101 tcatgtctgt ataccgtcga cctctagcta gagcttggcg taatcatggt catagctgtt  
5161 tcctgtgtga aattgttatc cgctcacaat tccacacaac atacgagccg gaagcataaa  
5221 gtgtaaagcc tggggtgcct aatgagtgag ctaactcaca ttaattgctg tgcgctcact  
5281 gcccgctttc cagtcgggaa acctgtcgtg ccagctgcat taatgaatcg gccaacgcgc  
5341 ggggagaggc ggtttgcgta ttgggcgctc ttccgcttcc tcgctcactg actcgtcgcg  
5401 ctcggtcgtt cggctgcggc gagcggatc agctcactca aaggcggtaa tacggtatc  
5461 cacagaatca ggggataacg caggaaagaa catgtgagca aaaggccagc aaaaggccag  
5521 gaaccgtaaa aaggccgcgt tgctggcgct tttccatagg ctccgcccc ctgacgagca  
5581 tcacaaaaat cgacgtcaa gtcagagggt gcgaaaccg acaggactat aaagatacca  
5641 ggcttttccc cctggaagct ccctcgtgcg ctctcctgtt ccgaccctgc cgcttaccgg  
5701 atacctgtcc gcctttctcc cttcgggaag cgtggcgctt tctcatagct cagcgttag  
5761 gtatctcagt tcggtgtagg tcgttcgctc caagctgggc tgtgtgcacg aacccccctg  
5821 tcagcccagc cgctgcgctc tatccggtaa ctatcgtctt gagtccaacc cggtaaagca  
5881 cgacttatcg ccactggcag cagccactgg taacaggatt agcagagcga ggtatgtagg  
5941 cgggtctaca gagttcttga agtggtggcc taactacggc tacaactaga gaacagtatt  
6001 tggatctctg gctctgctga agccagttac cttcggaaaa agagtggta gctcttgatc  
6061 cggcaaaaca accaccgctg ttagcgggtt tttgtttgc aagcagcaga ttacgcgcag  
6121 aaaaaaagga tctcaagaag atcctttgat cttttctaag gggctctgac ctcagtggaa  
6181 cgaaaaactca cgtaaggga ttttggctat gagattatca aaaaggatct tcacctagat  
6241 ccttttaaat taaaaatgaa gttttaaatc aatctaaagt atatatgagt aaacttgctc  
6301 tgacagttac caatgcttaa tcagtgaggc acctatctca gcgatctgtc tatttcgctc  
6361 atccatagtt gcctgactcc ccgtcgtgta gataactacg atacgggagg gcttaccatc  
6421 tggccccagt gctgcaatga taccgcgaga cccacgctca ccggctccag atttatcagc  
6481 aataaaccag ccagccggaa gggccgagcg cagaagtggc cctgcaactt tatccgctc  
6541 catccagtct ataatgtgt gccgggaagc tagagtaagt agttcggcag ttaatagttt  
6601 gcgcaacggt gttgccattg ctacaggcat cgtgggtgca cgctcgtcgt ttggtatggc  
6661 ttcattcagc tccggttccc aacgatcaag gcgagttaca tgatccccc tgttgtgcaa  
6721 aaaagcgggt agctccttcg gtcctcgcg cgttgtcaga agtaagttgg ccgagtggt  
6781 atcaactcat gttatggcag cactgcataa ttctcttact gtcattgcat ccgtaagatg  
6841 cttttctgtg actggtgagt actcaaccaa gtcattctga gaatagtgtg tgcggcgacc  
6901 gagttgctct tgcccggcgt caatacggga taatacccg ccacatagca gaactttaa  
6961 agtgctcatc attgaaaaac gttcttcggg gcgaaaactc tcaaggatct taccgctgtt  
7021 gagatccagt tcgatgtaac ccactgtgc acccaactga tcttcagcat cttttacttt  
7081 caccagcgtt tctgggtgag caaaaaacagg aaggcaaaat gccgcaaaaa agggataaag  
7141 ggcgacacgg aatgttgaa tactcatact cttccttttt caatatatt gaagcattta  
7201 tcagggttat tgtctcatga gcggatacat atttgaatgt atttagaaaa ataaacaaat  
7261 aggggttccg cgagct

//

### 1.3 Coding sequence inserts

Coding sequences listed below extend from the PacI site to KpnI site of the pDL vector.

>GZB1-MCH

```
TTAATTAAGCCGCATGCAACCAATCCTGCTTCTGCTGGCCTTCTCCTGCTGCCAGGGCAGATGCAATCATCGGGGA
CATGAGGCCAAGCCCCTCCCGCCCCTACATGGCTTATCTTATGATCTGGGATCAGAAGTCTCTGAAGAGGTGCGGTGG
CTTCTGATACGAGACGACTTCGTGCTGACAGCTGCTACTGTTGGGAAGTCCATAAATGTACCTTGGGGCCACACA
ATATCAAAGAACAGGAGCCGACCCAGCAGTTTATCCCTGTGAAAAGACCCATCCCCATCCAGCCTATAATCCTAAGAAC
TTCTCCAACGACATCATGCTACTGCAGCTGGAGAGAAAGGCCAAGCGGACCAGAGCTGTGCAGCCCCTCAGGCTACCTAG
CAACAAGGCCAAGGCGCGCTGGAGGTGGGGTCTGGCGGGGTGGATCAGGGGGTGGAGGTTCCGGTGGAGGTGGGT
CGGGCGGCCATCATCAAGGAGTTCATGCGCTTCAAGGTGCACATGGAGGGCTCCGTGAACGGCCACGAGTTCGAGATC
GAGGGCAGGGCGAGGGCCCTACGAGGGCACCCAGACCCCAAGCTGAAGGTGACCAAGGGTGGCCCCCTGCCCTT
CGCCTGGGACATCCTGTCCCCTCAGTTCATGTACGGCTCCAAGGCCTACGTGAAGCACCCCGCCGACATCCCCGACTACT
TGAAGCTGTCTTCCCGAGGGCTTCAAGTGGGAGCGCTGATGAACTTCGAGGACGGCGCGTGGTGACCGTGACCCAG
GACTCCTCCCTGCAGGACGCGAGTTCATCTACAAGGTGAAGCTGCGCGGCACCAACTTCCCCTCCGACGGCCCCGTAAAT
GCAGAAGAAGACCATGGGCTGGGAGGCCTCCTCCGAGCGGATGTACCCCGAGGACGGCGCCCTGAAGGGCGAGATCAAGC
AGAGGCTGAAGCTGAAGGACGGCGGCCACTACGACGCTGAGGTCAAGACCACCTACAAGGCCAAGAAGCCCGTGCAGCTG
CCCGCGCCTACAACGTCAACATCAAGTTGGACATCACCTCCACAACGAGGACTACACCATCGTGAACAGTACGAACG
CGCCGAGGGCCGCACTCCACCGCGCATGGACGAGCTGTACAAGGAATTCTAATAGCTCGAGGGTACC
```

>GZB2-MCH

```
TTAATTAAGCCGCATGCAACCAATCCTGCTTCTGCTGGCCTTCTCCTGCTGCCAGGGCAGATGCAGTGAAGCCAGGG
CAGACATGCAGTGTGGCCGCTGGGGCAGACGGCCCCCTGGGAAAACACTCACACACTACAAGAGGTGAAGATGAC
AGTGCAGGAAGATCGAAAGTGCGAATCTGACTTACGCCATTATTACGACGTACCATTTGAGTTGTGCGTGGGGACCCAG
AGATTAAGAAAGACTTCTTTAAGGGGACTCTGGAGGCCCTTGTGTGTAACAAGGTGGCCAGGGCATTGTCTCCTAT
GGACGAAAACATGGCATGCCTCCACGAGCCTGCACCAAAGTCTCAAGCTTTGTACACTGGATAAAGAAAACCATGAAACG
CTACGGCGCCGCTGGAGGTGGGGTCTGGCGGGGTGGATCAGGGGGTGGAGGTTCCGGTGGAGGTGGTGGGGCGCGC
CCATCATCAAGGAGTTCATGCGCTTCAAGGTGCACATGGAGGGCTCCGTGAACGGCCACGAGTTCGAGATCGAGGGCGAG
GGCGAGGGCCGCCCCTACGAGGGCACCCAGACCCCAAGCTGAAGGTGACCAAGGGTGGCCCCCTGCCCTTCGCTGGGA
CATCCTGTCCCCTCAGTTCATGTACGGCTCCAAGGCCTACGTGAAGCACCCCGCCGACATCCCCGACTACTTGAAGCTGT
CCTTCCCGAGGGCTTCAAGTGGGAGCGCTGATGAACTTCGAGGACGGCGCGTGGTGACCGTGACCCAGGACTCCTCC
CTGCAGACGGCGAGTTCATCTACAAGGTGAAGCTGCGGGCACCAACTTCCCCTCCGACGGCCCCGTAATGCAGAAGAA
GACCATGGGCTGGGAGGCCTCCTCCGAGCGGATGTACCCCGAGGACGGCGCCCTGAAGGGCGAGATCAAGCAGAGGCTGA
AGCTGAAGGACGGCGGCCACTACGACGCTGAGGTCAAGACCACCTACAAGGCCAAGAAGCCCGTGCAGCTGCCGGCGCC
TACAAGTCAACATCAAGTTGGACATCACCTCCACAACGAGGACTACACCATCGTGAACAGTACGAACGCGCCGAGGG
CGCCACTCCACCGCGGCATGGACGAGCTGTACAAGGAATTCTAATAGCTCGAGGGTACC
```

>GZB-MCH

```
TTAATTAAGCCGCATGCAACCAATCCTGCTTCTGCTGGCCTTCTCCTGCTGCCAGGGCAGATGCAGGGGAGATCATC
GGGGGACATGAGGCCAAGCCCCTCCCGCCCCTACATGGCTTATCTTATGATCTGGGATCAGAAGTCTCTGAAGAGGTG
CGGTGGCTTCTGATACGAGACGACTTCGTGCTGACAGCTGCTACTGTTGGGAAGTCCATAAATGTACCTTGGGGG
CCCACAATATCAAAGAACAGGAGCCGACCCAGCAGTTTATCCCTGTGAAAAGACCCATCCCCATCCAGCCTATAATCCT
AAGAATTCTCCAACGACATCATGCTACTGCAGCTGGAGAGAAAGGCCAAGCGGACCAGAGCTGTGCAGCCCCCTCAGGCT
ACCTAGCAACAAGGCCAGGTGAAGCCAGGGCAGACATGCAGTGTGGCCGGCTGGGGGACAGCGGCCCCCTGGGAAAAC
ACTCACACACTACAAGAGGTGAAGATGACAGTGCAGGAAGATCGAAAAGTGCGAATCTGACTTACGCCATTATTACGAC
AGTACCATTTGAGTTGTGCGTGGGGGACCCAGAGATTAAGAAAGACTTCTTTAAGGGGACTCTGGAGGCCCTTGTGTG
TAACAAGGTGGCCAGGGCATTGTCTCCTATGGACGAAACATGGCATGCCTCCACGAGCCTGCACCAAAAGTCTCAAGCT
TTGTACTACTGGATAAAGAAAACCATGAAAACGCTACGCGGCCGCTGGAGGTGGGGTCTGGCGGGGTGGATCAGGGGT
GGAGGTTCCGGTGGAGGTGGTGGGGCGGCCATCATCAAGGAGTTCATGCGCTTCAAGGTGCACATGGAGGGCTCCGT
GAACGGCCACGAGTTCGAGATCGAGGGCGAGGGCGAGGGCCGCCCCCTACGAGGGCACCCAGACCCCAAGCTGAAGGTGA
CCAAGGGTGGCCCCCTGCCCTTCGCTGGGACATCCTGTCCCCTCAGTTCATGTACGGCTCCAAGGCCTACGTGAAGCAC
CCCCCGACATCCCCGACTACTTGAAGCTGTCTTCCCCGAGGGCTTCAAGTGGGAGCGCGTGAATGAAGTTCAAGGACGG
CGGGTGGTGACCGTGACCCAGGACTCCTCCTGCAGGACGGCGAGTTCATCTACAAGGTGAAGCTGCGGGCACCAACT
TCCCCTCCGACGGCCCCGTAATGCAGAAGAAGACCATGGGCTGGGAGGCCTCCTCCGAGCGGATGTACCCCGAGGACGGC
GCCCTGAAGGGCGAGATCAAGCAGAGGCTGAAGCTGAAGGACGGCGGCCACTACGACGCTGAGGTCAAGACCACCTACAA
GGCCAAGAAGCCCGTGCAGCTGCCGGCGCCTACAACGTCAACATCAAGTTGGACATCACCTCCACAACGAGGACTACA
CCATCGTGAACAGTACGAACGCGCCGAGGGCCGCACTCCACCGCGCATGGACGAGCTGTACAAGGAATTCTAATAG
```

```

CTCGAGGGTACC
>GZBSS-MCH
TTAATTAAGCCGCCATGCAACCGATCTTGTTGCTGCTGGCTTTTCTGCTGTTGCCAAGGGCAGACGCTGGAGAGGGCGCG
CCCATCATCAAGGAGTTTATGCGCTTCAAGGTGCACATGGAGGGTCCGTGAACGGCCACGAGTTCGAGATCGAGGGCGA
GGGCGAGGGCCGCCCTACGAGGGCACCCAGACCGCCAAGCTGAAGGTGACCAAGGGTGGCCCCCTGCCCTTCGCCTGGG
ACATCCTGTCCCCTCAGTTCATGTACGGCTCCAAGGCCTACGTGAAGCACCCCGCCGACATCCCGACTACTTGAAGCTG
TCCTTCCCCGAGGGCTTCAAGTGGGAGCGCGTGATGAACTTCGAGGACGGCGCGCTGGTGACCGTGACCCAGGACTCCTC
CCTGCAGGACGGCGAGTTCATCTACAAGGTGAAGCTGCGCGGCACCAACTTCCCCTCCGACGGCCCCGTAATGCAGAAGA
AGACCATGGGCTGGGAGGCCTCCTCCGAGCGGATGTACCCCGAGGACGGCGCCCTGAAGGGCGAGATCAAGCAGAGGCTG
AAGCTGAAGGACGGCGGCCACTACGACGCTGAGGTCAAGACCACCTACAAGGCCAAGAAGCCCCGTGCAGCTGCCCCGGCGC
CTACAACGTCAACATCAAGTTGGACATCACCTCCCACAACGAGGACTACACCATCGTGGAACAGTACGAACGCGCCGAGG
GCCGCCACTCCACCGCGGCATGGACGAGCTGTACAAGGAATTCTAATAGCTCGAGGGTACC
>GZBSS-MCH-GZBSM
TTAATTAAGCCGCCATGCAACCGATCTTGTTGCTGCTGGCTTTTCTGCTGTTGCCAAGGGCAGACGCTGGAGAGGGCGCG
CCCATCATCAAGGAGTTTATGCGCTTCAAGGTGCACATGGAGGGTCCGTGAACGGCCACGAGTTCGAGATCGAGGGCGA
GGGCGAGGGCCGCCCTACGAGGGCACCCAGACCGCCAAGCTGAAGGTGACCAAGGGTGGCCCCCTGCCCTTCGCCTGGG
ACATCCTGTCCCCTCAGTTCATGTACGGCTCCAAGGCCTACGTGAAGCACCCCGCCGACATCCCGACTACTTGAAGCTG
TCCTTCCCCGAGGGCTTCAAGTGGGAGCGCGTGATGAACTTCGAGGACGGCGCGCTGGTGACCGTGACCCAGGACTCCTC
CCTGCAGGACGGCGAGTTCATCTACAAGGTGAAGCTGCGCGGCACCAACTTCCCCTCCGACGGCCCCGTAATGCAGAAGA
AGACCATGGGCTGGGAGGCCTCCTCCGAGCGGATGTACCCCGAGGACGGCGCCCTGAAGGGCGAGATCAAGCAGAGGCTG
AAGCTGAAGGACGGCGGCCACTACGACGCTGAGGTCAAGACCACCTACAAGGCCAAGAAGCCCCGTGCAGCTGCCCCGGCGC
CTACAACGTCAACATCAAGTTGGACATCACCTCCCACAACGAGGACTACACCATCGTGGAACAGTACGAACGCGCCGAGG
GCCGCCACTCCACCGCGGCATGGACGAGCTGTACAAGGAATTCAAGCTGCTCACTGTTGGGGAAGTCCATAAATGTC
ACCTTGGGGGCCACAATATCAAAGAACAGGAGCCGACCCAGCAGTTTATCCCTGTGAAAAGACCCATCCCCATCCAGC
CTATAATCTAAGAACTTCTCCAACGACATCATGCTACTGCAGCTGGAGAGAAAGGGTACC
>MCH
TTAATTAAGCCGCCATGATCATCAAGGAGTTTATGCGCTTCAAGGTGCACATGGAGGGTCCGTGAACGGCCACGAGTTC
GAGATCGAGGGCGAGGGCGAGGGCCGCCCTACGAGGGCACCCAGACCGCCAAGCTGAAGGTGACCAAGGGTGGCCCCCT
GCCCTTCGCCTGGGACATCCTGTCCCCTCAGTTCATGTACGGCTCCAAGGCCTACGTGAAGCACCCCGCCGACATCCCGG
ACTACTTGAAGCTGTCTTCCCCGAGGGCTTCAAGTGGGAGCGCGTGATGAACTTCGAGGACGGCGCGCTGGTGACCGTG
ACCCAGGACTCCTCCCTGCAGGACGGCGAGTTCATCTACAAGGTGAAGCTGCGCGGCACCAACTTCCCCTCCGACGGCCC
CGTAATGCAGAAGAAGACCATGGGCTGGGAGGCCTCCTCCGAGCGGATGTACCCCGAGGACGGCGCCCTGAAGGGCGAGA
TCAAGCAGAGGCTGAAGCTGAAGGACGGCGGCCACTACGACGCTGAGGTCAAGACCACCTACAAGGCCAAGAAGCCCCGTG
CAGCTGCCCCGGCGCCTACAACGTCAACATCAAGTTGGACATCACCTCCCACAACGAGGACTACACCATCGTGGAACAGTA
CGAACGCGCCGAGGGCCGCCACTCCACCGCGGCATGGACGAGCTGTACAAGGAATTCTAATAGCTCGAGGGTACC

```

## 2 Image filtration and colocalization analysis: MATLAB source code

```

%------%
%—Name: LAGfilter_batch.m
%—Author: Daniel Woodsworth
%—Date: March 3, 2017
%
%LAG = local and global filter
%
%Basic idea is to account for local variations in background signal, but
%also to achieve robust filtering of noise (so local and global filtering)
%
%To do this, first calculate local background for each pixel, subtract this
%background from original image.
%

```

```

%Then calculate global median absolute deviation. Use this as estimate of
%variance of pixel noise, and define threshold as some multiple of this.
%Define all pixels below this threshold as noise, and set to zero.

%Local pixel intensity idea comes from Dunn et al 2011
%Median absolute deviation idea comes from Josh Scurl

clear all
close all
clc

#####PARAM SET HERE#####
%Set paths here for input and output directories
inPath = '/Volumes/DAN/coloc/RAW/';
outPath = '/Volumes/DAN/coloc/FILT/';

#####PARAM SET HERE#####
%length on either side of current pixel that to make box for median
%calculation
L = 12;

#####PARAM SET HERE#####
%Number of standard deviations above MAD to consider as above background
%These are empirical
C0_threshold = 3;
C1_threshold = 6;

#####PARAM SET HERE#####
%Regex pattern for extracting unique identifier of sample image (e.g.
%within given sample, whatever IDs the actual image files)
CaptureNumberPattern = '^Capture (\d+)-';

%Get directories in basepath
tmp = dir(inPath);
dirs = {tmp.name};
dirs([1,2]) = []; %Delete . and ..

for dirindex = 1:length(dirs)

    %Assume each directory name is sample name
    SampleName = dirs{dirindex};
    path = fullfile(inPath,dirs{dirindex});
    writePath = fullfile(outPath,dirs{dirindex});

    %Get all image file names, assuming tiff extension
    im_files = dir(fullfile(path,'*.tiff'));
    fnames = {im_files.name};

    %Get all unique captures. Each capture has separate tiff for each
    %channel. Assume format of Name_Cx.tiff, where x = 0,1 is channel id.
    %Strip channel id to get actual name, then strip duplicates.
    [temp, basenames, extensions] = cellfun(@fileparts,fnames, 'UniformOutput', false);
    ImageNames = cellfun(@(x) x(1:end-3), basenames, 'UniformOutput', false);
    ImageNames = unique(ImageNames);

```



```

mkdir(writePath);

SampleName

for i = 1:length(ImageNames)

    %Get unique identifier of image file name
    [tokens , matches] = regexp(ImageNames{i} , CaptureNumberPattern , 'tokens ' , 'match ');
    CaptureNumber = cell2mat(tokens {1});

    CaptureNumber

    C0_img_name = fullfile(path , strcat(ImageNames{i} , '_C0' , extensions {1}));
    C1_img_name = fullfile(path , strcat(ImageNames{i} , '_C1' , extensions {1}));

    %% Read image
    imf = imfinfo(C0_img_name);
    C0_img = zeros(imf(1).Height , imf(1).Width , 'single ');
    C0_img(:,:) = imread(C0_img_name);

    imf = imfinfo(C1_img_name);
    C1_img = zeros(imf(1).Height , imf(1).Width , 'single ');
    C1_img(:,:) = imread(C1_img_name);

    %——C0 = green channel = lytic granule filter ——%
    %Useful for punctuate type objects

    %min and max pixels to consider , to account for edge cases
    min_pix = L+1;
    max_pix = size(C0_img,1)-L;

    %Initialize background matrix to maximum pixel intensity
    bg = repmat(max(C0_img(:)) , size(C0_img,1) , size(C0_img,1));

    %Calculate localized background pixel intensity for whole image
    for k = min_pix:max_pix
        for j = min_pix:max_pix

            sub = C0_img((k-L):(k+L) , (j-L):(j+L));

            bg(k,j) = median(sub(:));

        end
    end

    %Subtract local background from image
    C0_im_bgfilt = C0_img-bg;

    %Set any negative pixels to 0
    C0_im_bgfilt(C0_im_bgfilt < 0) = 0;

    %Now subtract MAD from image to filter pixel noise
    %See below for more information
    %Since so many pixels are 0 , use all nonzero pixels to calculate MAD

```

```

%I don't know why using the original image works better, but it cleans up
%pixel noise better (essentially a higher threshold)

C0_pos = C0_img(C0_img > 0);
mad_C0 = median(abs(C0_pos(:) - median(C0_pos(:)))));
noise_std_C0 = 1.4826 * mad_C0; %See below for explanation

%Noise filter. Set all pixels below threshold to 0
C0_mad_sub = C0_img_bgfilt;

C0_mad_sub(C0_mad_sub < noise_std_C0 * C0_threshold) = 0;

%C1 = RED = mCherry channel
%———Good for homogenous structures———%
%
%Just do MAD threshold, but with 6sigma

C1_pos = C1_img(C1_img > 0);
mad_C1 = median(abs(C1_pos(:) - median(C1_pos(:)))));
noise_std_C1 = 1.4826 * mad_C1; %See below for explanation

%Noise filter. Set all pixels below 6 sigma threshold to 0
C1_mad_sub = C1_img;

C1_mad_sub(C1_mad_sub < noise_std_C1 * C1_threshold) = 0;

%Write images
C0_OUT = fullfile(writePath, strcat(ImageNames{i}, '_filt_C0', extensions{1}));
C1_OUT = fullfile(writePath, strcat(ImageNames{i}, '_filt_C1', extensions{1}));

imwrite(uint16(C0_mad_sub), C0_OUT);
imwrite(uint16(C1_mad_sub), C1_OUT);

end

end

%———Background on MAD derivation etc———%

% Convert the median absolute deviation to something more resembling a
% standard deviation. This is used instead of calculating the standard
% deviation directly because the median absolute deviation ignores outliers
% (and actual spots), giving a result after normalisation closer to the
% standard deviation of noise alone, with other image features ignored.
% (See http://en.wikipedia.org/wiki/Median\_absolute\_deviation#Relation\_to\_standard\_deviation
% for the conversion factor)

%calculate the absolute median deviation
%This is mad = median(abs(Intensity_i - median(Intensity)))

```

```
%In other words: calculate median intensity of images using all pixels.  
%Subtract this from each pixel.  
%Take absolute value of these values  
%Calculate median of these values  
%  
%Sigma  $\sim 1.4\text{mad}$  (see wikipedia article on mad)  
%To be very sure that retain only signal, take all pixels that have  
%intensity that is  $6*\text{sigma}$  above  $1.4*\text{mad}$ 
```
